# Supplementary material
Source: PubMed Central journal article supplement (PMC7249235)
Supplement: NIHMS1581104-supplement-Supplemental_Figures.pdf [file NIHMS1581104-supplement-Supplemental_Figures.pdf]

### Supplemental Figure S1

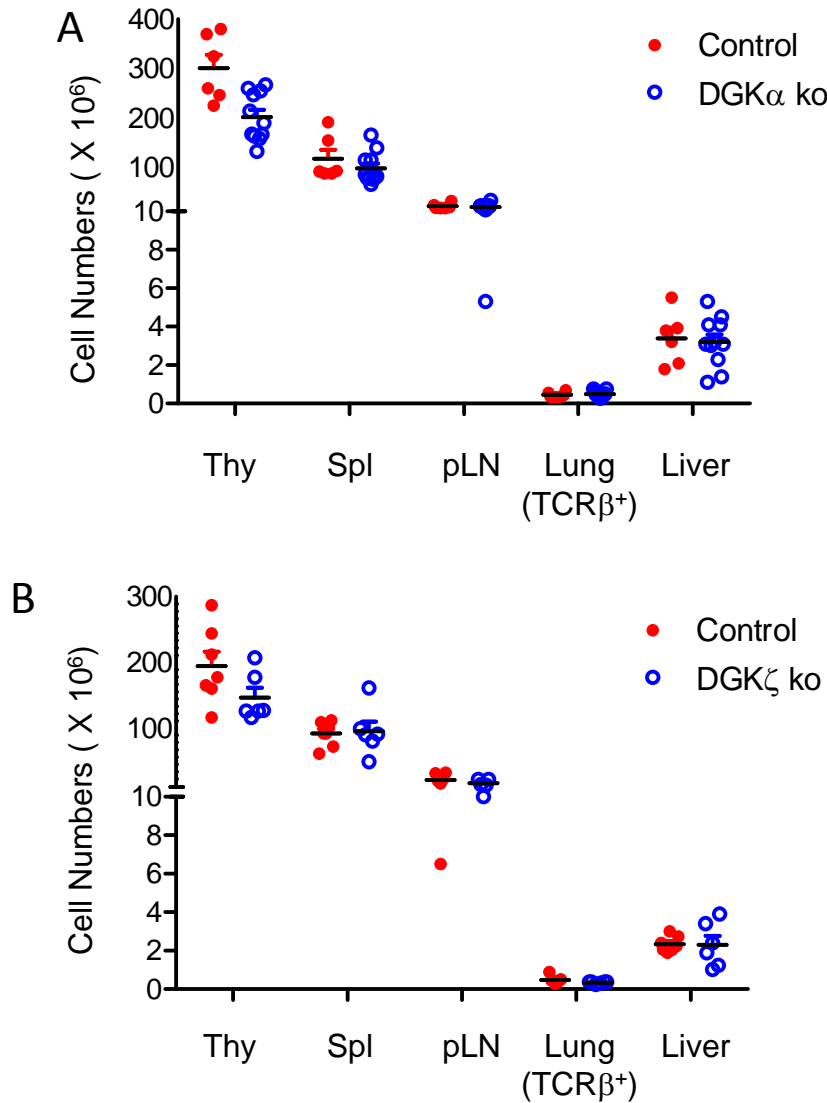

**Supplemental Figure 1. Total cellularity in DGK $\alpha$  or  $\zeta$ -deficient mice.** Scatter plots show total cell numbers in the thymus (Thy), spleen (Spl), and peripheral lymph nodes (pLN), as well as total TCR $\beta^+$  cells in the lung and total mononuclear cells in the liver in DGK $\alpha^{-/-}$  mice (A, N = 6 for control, N = 11 for DGK $\alpha$  KO) and in DGK $\zeta^{-/-}$  mice (B, N = 7 for control, N = 6 for DGK $\zeta$  KO) and their respective heterozygous or WT control mice. Data shown are pooled from at least six experiments. Each circle represents one mouse of the indicated genotypes.

## Supplemental figure S2

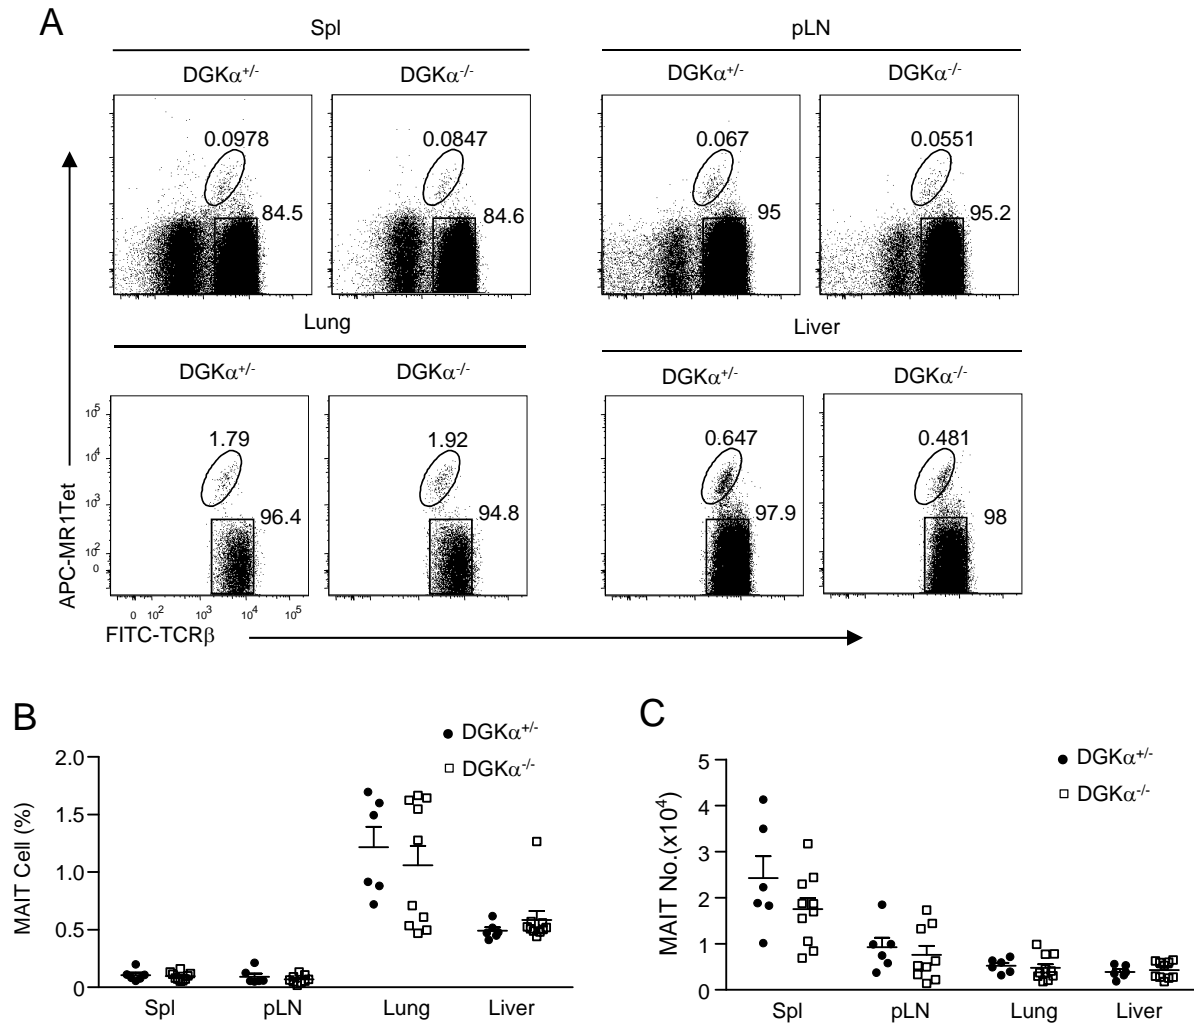

**Supplemental Figure 2. MAIT cells in the peripheral organs in DGK $\alpha^{-/-}$  mice.** Single cell suspensions of the spleen, pLNs, lung, and mononuclear cells (MNCs) of the liver from 8–10-week-old DGK $\alpha^{-/-}$  and DGK $\alpha^{+/+}$  litter mate control mice were directly stained with MR1Tet, anti-TCR $\beta$ , CD44, CD24, CD45, and lineage antibodies. **A.** Dot plots show TCR $\beta$  and MR1Tet straining in live gated Lin<sup>-</sup> cells. Only TCR $\beta$ <sup>+</sup> cells are shown in lung and liver plots. **B.** MAIT cell percentages. **C.** CD24<sup>+</sup>CD44<sup>+</sup> MAIT cell numbers. Data shown are representative or pooled from at least six experiments.

### Supplemental figure S3

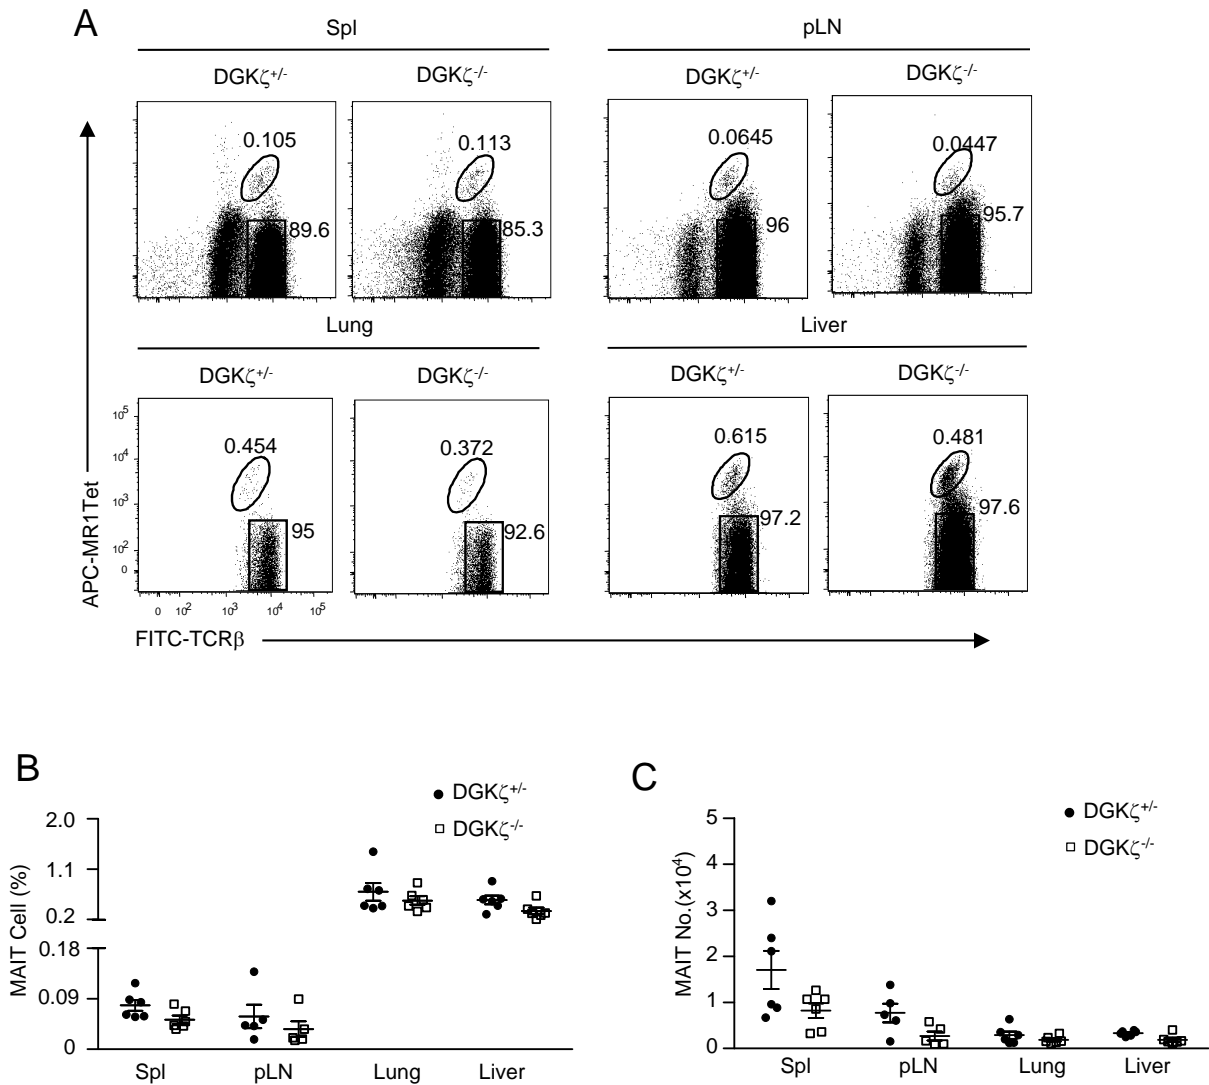

**Supplemental Figure 3. MAIT cells in the peripheral organs in  $DGK\zeta^{-/-}$  mice.** Single cell suspensions of the spleen, pLNs, lung, and mononuclear cells (MNCs) of the liver from 8–10-week-old  $DGK\zeta^{-/-}$  and  $DGK\zeta^{+/+}$  littermate control mice were directly stained with MR1Tet, anti-TCR $\beta$ , CD44, CD24, CD45, and lineage antibodies. **A.** Dot plots show TCR $\beta$  and MR1Tet straining in live gated Lin<sup>-</sup> cells. Only TCR $\beta$ <sup>+</sup> cells are shown in lung and liver plots. Data shown are representative or calculated from at least five experiments. **B.** MAIT cell percentages. **C.** CD24<sup>+</sup>CD44<sup>+</sup> MAIT cell numbers. Data are pooled from at least five experiments. Mean  $\pm$  SME are shown. N = 6 for Spleen, lung, and liver. N = 5 for pLN.

## Supplemental figure S4

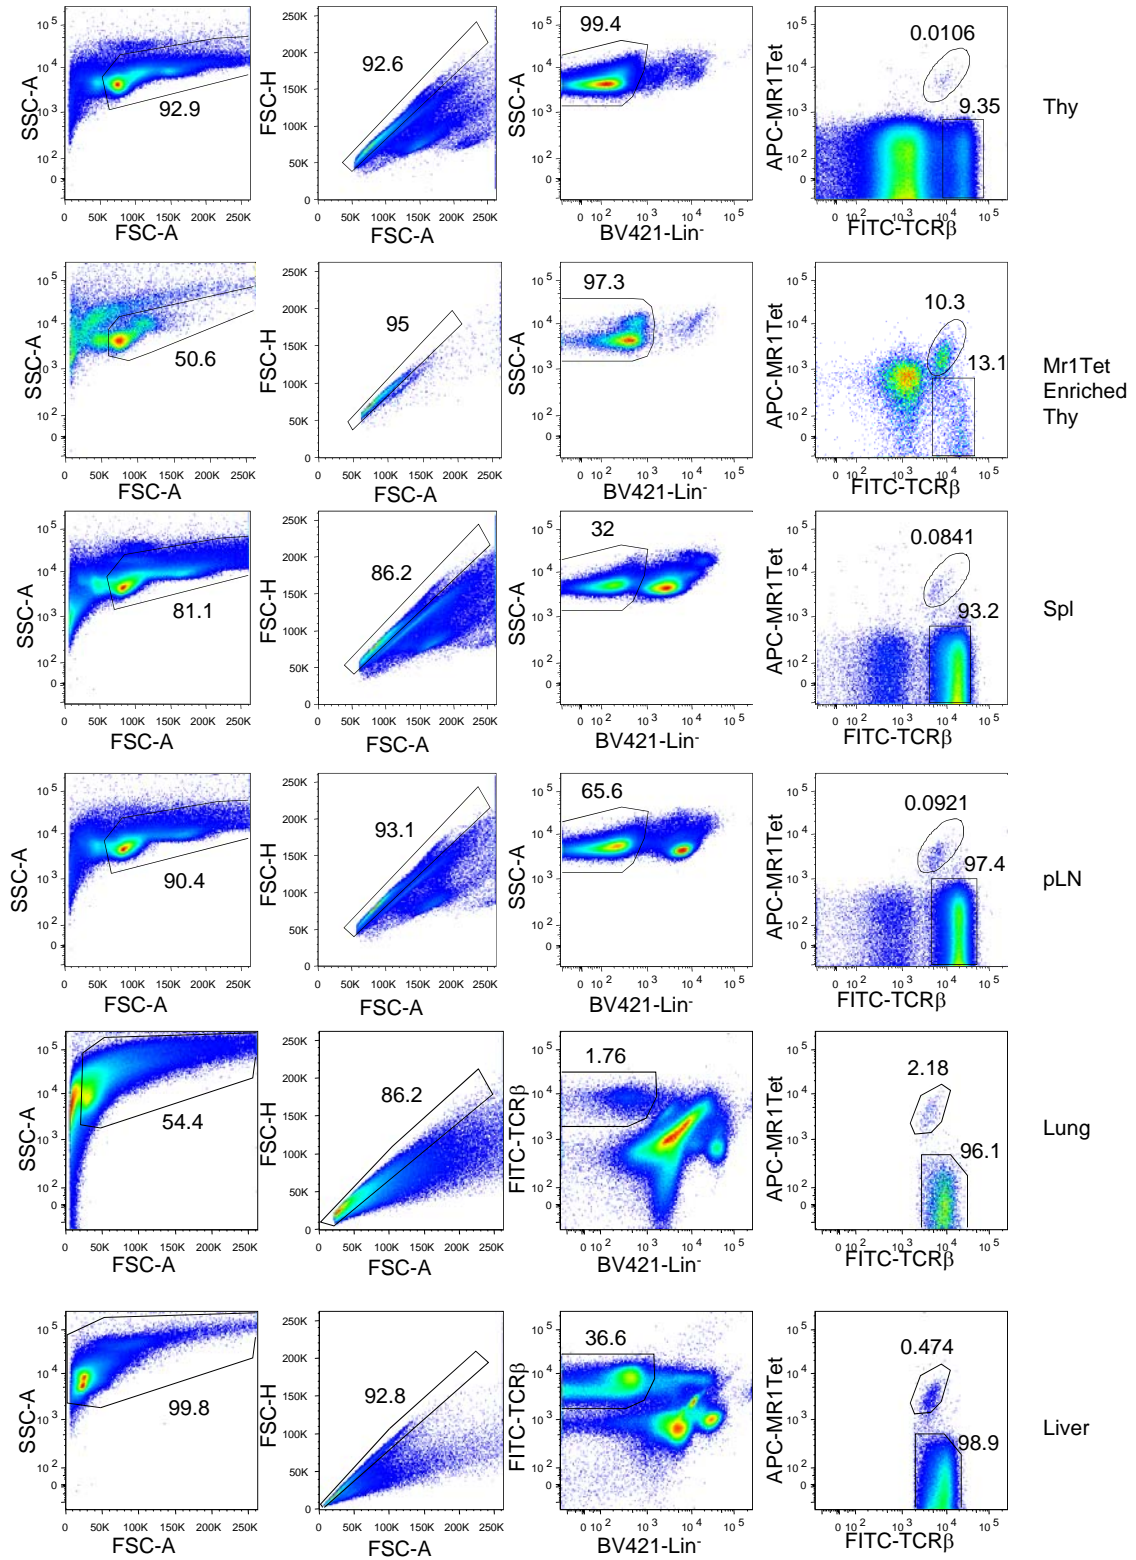

Supplemental Figure 4. Gating strategies for MAIT cells in different organs.
